# Supplementary material
Source: PubMed Central journal article supplement (PMC3901420)
Supplement: jn.113.181487_nutrition181487SupplementaryData1.pdf [file jn.113.181487_nutrition181487SupplementaryData1.pdf]

Online Supporting Material

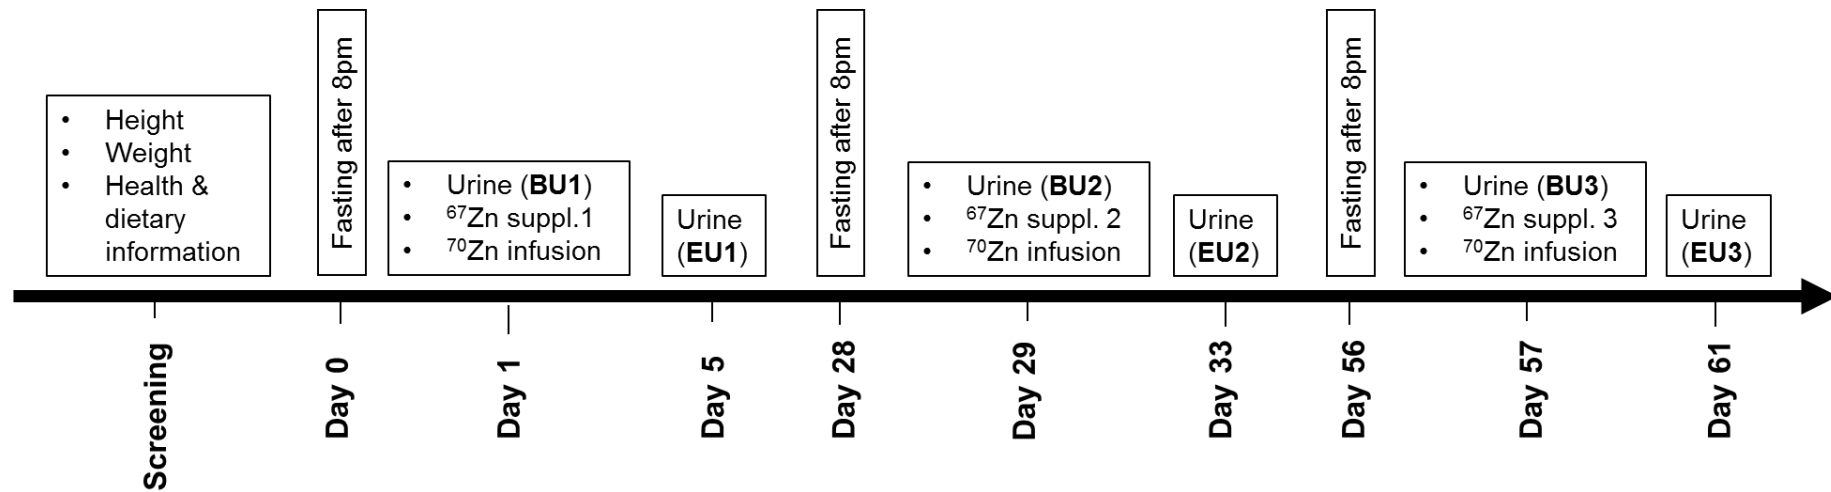

SUPPLEMENTAL FIGURE 1: Detailed study procedure (the 3 different test supplements zinc citrate, zinc gluconate and zinc oxide were administered in random order); BU (Baseline urine), EU (Enriched urine)
