# Supplementary material
Source: PubMed Central journal article supplement (PMC3901420)
Supplement: jn.113.181487_nutrition181487SupplementaryData2.pdf [file jn.113.181487_nutrition181487SupplementaryData2.pdf]

SUPPLEMENTAL TABLE 1: Fractional absorption of zinc measured in studies with zinc fortified foods using the DITR technique

| Study                      | Studied population       | Fortified food                                                                   | Phytate content of test meal<br><i>mg</i> | Phytate:zinc molar ratio    | Zn compound            | Zn content of test meal <sup>1</sup><br><i>mg</i> | Zn tracer <sup>2</sup><br><i>mg</i>                | FAZ<br>%     |
|----------------------------|--------------------------|----------------------------------------------------------------------------------|-------------------------------------------|-----------------------------|------------------------|---------------------------------------------------|----------------------------------------------------|--------------|
| Herman et al. 2002 (20)    | Children, 4-8 y, healthy | White wheat flour dumplings                                                      | 29                                        | 1.64                        | Zn sulfate<br>Zn oxide | 0.25 (native)<br>0.25 (native)                    | 1.5 ( <sup>67</sup> Zn)<br>1.5 ( <sup>67</sup> Zn) | 23.7<br>24.1 |
| Avalos et al. 2004 (23)    | Children, 6-9 y, healthy | Multiple micronutrient fortified beverage <i>alone</i>                           | 0                                         | NA                          | Zn gluconate           | 3.75 (native)                                     | 2.0 ( <sup>67</sup> Zn)                            | 22.8         |
|                            |                          | Multiple micronutrient fortified beverage <i>with a test meal</i>                | NA                                        | NA                          | Zn gluconate           | 4.85 (native) <sup>3</sup>                        | 0.4 ( <sup>70</sup> Zn)                            | 24.5         |
| de Romana et al. 2005 (21) | Children, 3-4 y, stunted | Wheat biscuits and noodles as breakfast and lunch (tracer in accompanying water) | 399                                       | 6.4<br><i>low Zn group</i>  | Zn sulfate             | 5.9 (2.9 native + 3.0 fortified Zn)               | 0.3 ( <sup>70</sup> Zn)                            | 23.7         |
|                            |                          |                                                                                  |                                           | 3.2<br><i>high Zn group</i> | Zn sulfate             | 11.9 (2.9 native + 9.0 fortified Zn)              | 0.3 ( <sup>70</sup> Zn)                            | 13.3         |
| Hotz et al. 2005 (22)      | Women, 19-44 y, healthy  | Maize tortillas                                                                  | 564                                       | 17                          | Zn oxide               | 2.3 (native)                                      | 1 ( <sup>67</sup> Zn)                              | 10.8         |
|                            |                          |                                                                                  |                                           |                             | Zn sulfate             | 2.3 (native)                                      | 1 ( <sup>67</sup> Zn)                              | 10.0         |
|                            |                          |                                                                                  |                                           |                             | Zn oxide + EDTA        | 2.3 (native)                                      | 1 ( <sup>67</sup> Zn)                              | 12.7         |
|                            |                          |                                                                                  |                                           |                             | NaZnEDTA               | 2.3 (native)                                      | 1 ( <sup>67</sup> Zn)                              | 12.7         |

<sup>1</sup>Excluding tracer

<sup>2</sup>All studies used the same chemical form for the tracer as in the fortified foods

<sup>3</sup>Unlabeled zinc was added to reach the same total zinc content as in test drink alone for the sum of native, unlabeled and labeled zinc  
FAZ (Fractional absorption of zinc), NA (Not available)
